# Supplementary material for: Pulsatile drug release from electrospun poly(ethylene oxide)–sodium alginate blend nanofibres
Source: Royal Society of Chemistry journal article supplement (doi:10.1039/c3tb21605e), 2014-01-01
Supplement: c3tb21605e.pdf [file c3tb21605e.pdf]

Supporting information for:

**Pulsatile drug release from electrospun poly(ethylene oxide) – sodium alginate blend  
nanofibres**

Abdessamad Y. A. Kaassis,<sup>a</sup> Neil Young,<sup>b</sup> Naoko Sano,<sup>c</sup> Deng-Guang Yu,<sup>d</sup> Nicholas P. Chatterton,<sup>e\*</sup> and  
Gareth R. Williams<sup>a\*</sup>

<sup>a</sup> *UCL School of Pharmacy, University College London, 29-39 Brunswick Square, London, WC1N 1AX,  
UK*

<sup>b</sup> *Department of Materials, University of Oxford, Parks Road, Oxford, OX1 3PH, UK.*

<sup>c</sup> *NEXUS, Stephenson Building, Newcastle University, Newcastle upon Tyne, NE1 7RU, UK*

<sup>d</sup> *School of Materials Science & Engineering, University of Shanghai for Science and Technology,  
Shanghai 200093, China.*

<sup>e</sup> *School of Human Sciences, Faculty of Life Sciences and Computing, London Metropolitan University,  
166-220 Holloway Road, London, N7 8DB.*

*\* Authors for correspondence. Email: [g.williams@ucl.ac.uk](mailto:g.williams@ucl.ac.uk) (GRW), [n.chatterton@londonmet.ac.uk](mailto:n.chatterton@londonmet.ac.uk)  
(NPC); Tel: 0207 753 5868 (GRW), 0207 133 4373 (NPC).*

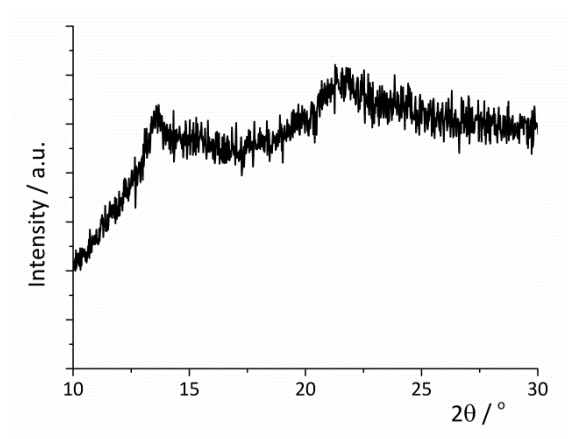

**Fig. S1.** The XRD pattern of sodium alginate (SA).

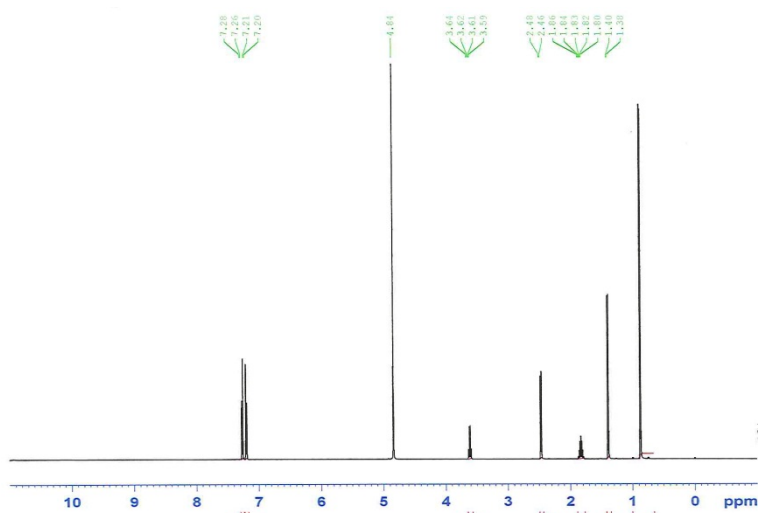

(a)

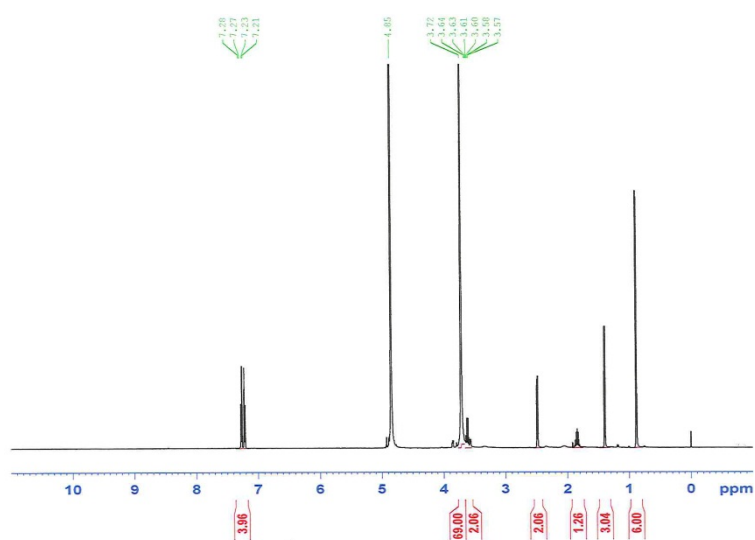

(b)

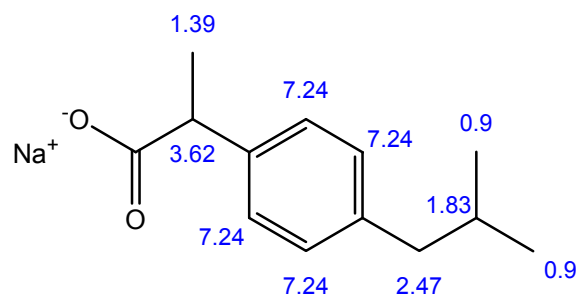

(c)

**Fig. S2.** NMR spectra of (a) sodium ibuprofen and (b) the F2 fibers after dissolution in D<sub>2</sub>O, together with (c) the chemical shifts predicted for SI (using the ChemDraw Ultra 12 software).
